# Supplementary material for: Spatial Computational Hepatic Molecular Biomarker Reveals LSEC Role in Midlobular Liver Zonation Fibrosis in DILI and NASH Liver Injury
Source: MDPI journal article supplement (doi:10.3390/ijtm4020012), 2024-03-23
Supplement: s1 [file s1]

## Supplemental figure

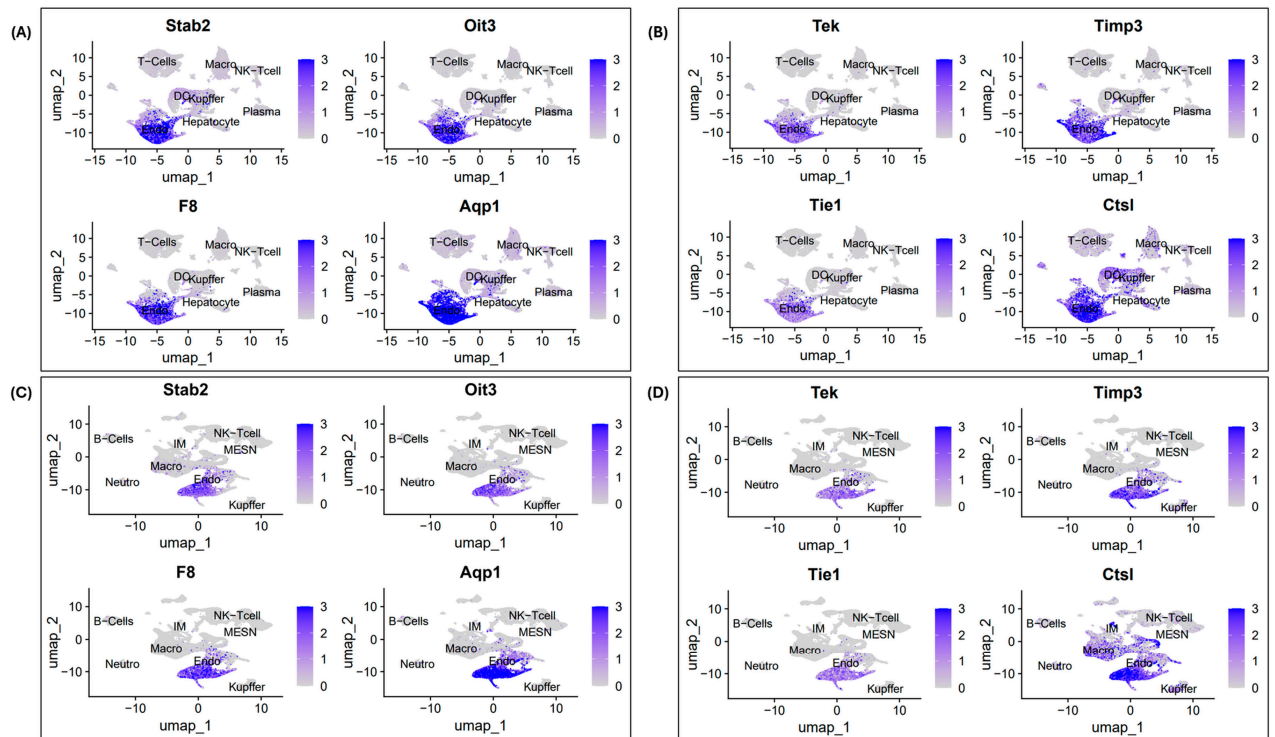

**Figure S1.** Expression profiles of eight commonly expressed genes STAB2, OIT3, F8, AQP1, TEK, TIMP3, TIE1, CTSL in DILI and NASH ECs populations (A)-(B) for control vs DILI; (C)-(D) for control vs NASH.

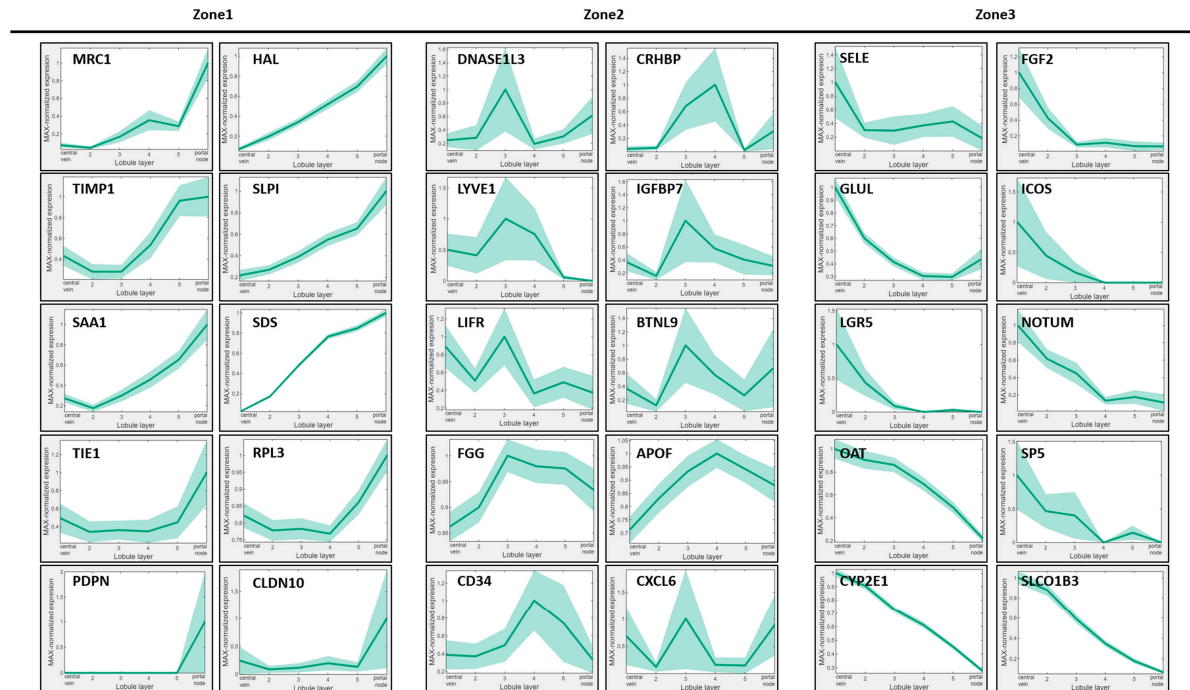

**Figure S2.** Zonation browser window: Illustrating normalized expression profiles of zone1, zone2 & zone 3 genes detected as LSECs and fibrosis-related markers.

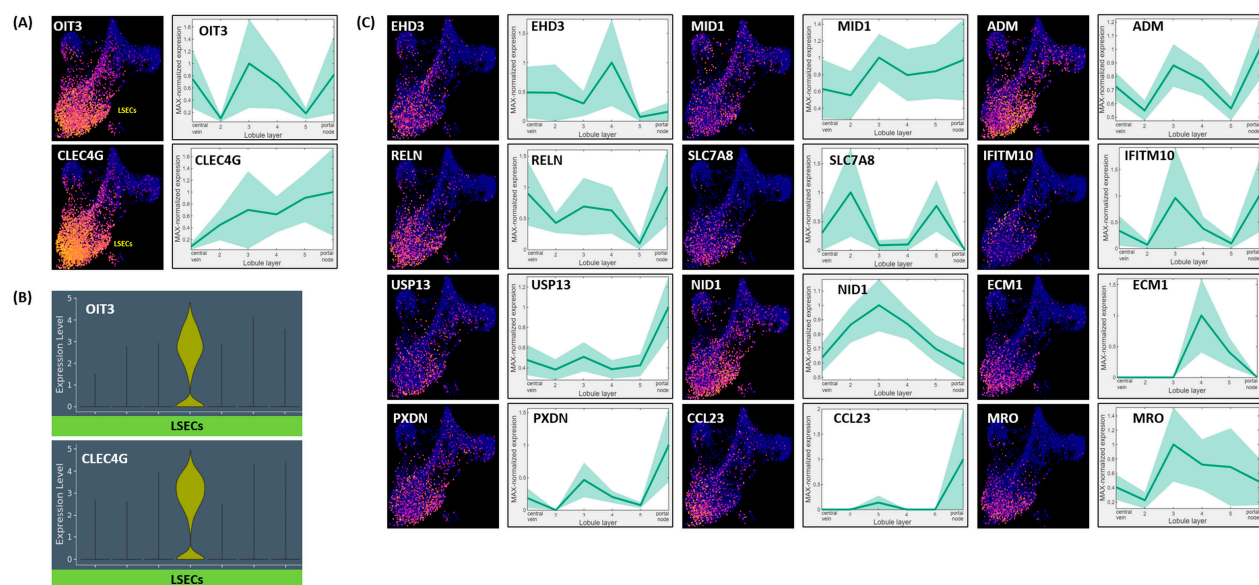

**Figure S3.** Expression profile LSECs markers; (A) OIT3 and CLEC4G are reported as hallmark genes expressed in LSECs and involved in fibrosis, illustrating and confirmed here as strongly expressed (validated in HuBMAP Azimuth liver reference cell dataset(left) and shown in zonation browser window (right), (B) expression for same two genes are validated at <http://liveratlas-vilarinholab.med.yale.edu/> (C) zone2 expression tested for other detected genes here (shown in zonation browser window) with mild-to-medium expression in LSECs. .
