# Supplementary material for: Spatial Computational Hepatic Molecular Biomarker Reveals LSEC Role in Midlobular Liver Zonation Fibrosis in DILI and NASH Liver Injury
Source: MDPI journal article supplement (doi:10.3390/ijtm4020012), 2024-03-23
Supplement: s1 [file s1]

Archive with 1 entries (1 files):
- ijtm-2887684-supplementary.pdf
